# Supplementary material
Source: Springer Nature journal article supplement (https://www.springermedizin.de/resource/supplementary/12936_2010_1429_MOESM2_ESM.pdf/9549786)
Supplement: MOESM2 [file 9549786]

Non Pilot Area

Pilot Area

MRDT Scale (1 to 15)

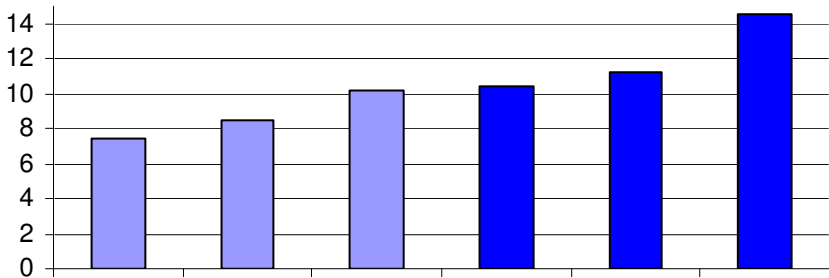

Luang Nam Tha

Savannakhet

Champasak

Sekong

Saravan

Attapeu
